# Supplementary material for: Branch point control at malonyl-CoA node: A computational framework to uncover the design principles of an ideal genetic-metabolic switch
Source: bioRxiv or medRxiv preprint supplement (doi:10.1101/847947), 2020-04-04
Supplement: Supplementary file [file media-1.pdf]

## Supplementary files

### Branch point control at malonyl-CoA node: A computational framework to optimize the controller architecture toward ideal metabolic switches

Peng Xu\*

Department of Chemical, Biochemical and Environmental Engineering, University of Maryland  
Baltimore County, Baltimore, MD 21250

\* Corresponding author, Tel: +1(410)-455-2474; fax: +1(410)-455-1049. E-mail address:  
pengxu@umbc.edu (PX)

*Parameters for Fig. 2, Fig. 3 and Fig. 4:*  $\alpha_1=0.8$ ;  $\alpha_2=0.05$ ;  $\alpha_3=0.05$ ;  $\alpha_4=0.8$ ;  $\beta_1=0.5$ ;  $\beta_2=2.0$ ;  $m=4$ ;  $n=4$ ;  $p=4$ ;  $q=4$ ;  $r=4$ ;  $u=4$ ;  $K_1=2$ ;  $K_2=5$ ;  $K_3=2$ ;  $K_4=2$ ;  $K_5=0.5$ ;  $K_6=0.5$ ;  $k_1=0.5$ ;  $k_2=0.6$ ;  $k_3=2$ ;  $k_4=2$ ;  $X_0=0$ ;  $S_0=45$ ;  $Y_{XS}=0.6$ ;  $Y_{PS1}=0.4$ ;  $Y_{PS2}=1.8$ ;  $\mu_{max}=2.2$ ;  $K_S=0.75$ ;  $K_m=0.5$ ;

*Parameters for Fig. 5 and Fig. 6:*  $\alpha_1=0.8$ ;  $\alpha_2=0.05$ ;  $\alpha_3=0.05$ ;  $\alpha_4=0.8$ ;  $\beta_1=0.5$ ;  $\beta_2=2.0$ ;  $m=4$ ;  $n=4$ ;  $p=4$ ;  $q=4$ ;  $r=4$ ;  $u=4$ ;  $D=0.15$ ;  $K_2=5$ ;  $K_3=2$ ;  $K_4=2$ ;  $K_5=0.5$ ;  $K_6=0.5$ ;  $k_1=0.5$ ;  $k_2=0.6$ ;  $k_3=2$ ;  $k_4=2$ ;  $X_0=0$ ;  $S_0=45$ ;  $Y_{XS}=0.6$ ;  $Y_{PS1}=0.4$ ;  $Y_{PS2}=1.8$ ;  $\mu_{max}=2.2$ ;  $K_S=0.75$ ;  $K_m=0.5$ ;

*Parameters for Fig. 7:*  $\alpha_1=0.8$ ;  $\alpha_2=0.05$ ;  $\alpha_3=0.05$ ;  $\alpha_4=0.8$ ;  $\beta_1=0.5$ ;  $m=4$ ;  $n=4$ ;  $p=4$ ;  $q=4$ ;  $r=4$ ;  $u=4$ ;  $D=0.15$ ;  $K_1=2$ ;  $K_2=5$ ;  $K_3=2$ ;  $K_4=2$ ;  $K_5=0.5$ ;  $K_6=0.5$ ;  $k_1=0.5$ ;  $k_2=0.6$ ;  $k_3=2$ ;  $k_4=2$ ;  $X_0=0$ ;  $S_0=45$ ;  $Y_{XS}=0.6$ ;  $Y_{PS1}=0.4$ ;  $Y_{PS2}=1.8$ ;  $\mu_{max}=2.2$ ;  $K_S=0.75$ ;  $K_m=0.5$ ;

*Parameters for Fig. 8:*  $\alpha_1=0.8$ ;  $\alpha_2=0.05$ ;  $\alpha_3=0.05$ ;  $\alpha_4=0.8$ ;  $\beta_1=0.5$ ;  $\beta_2=2.0$ ;  $m=4$ ;  $n=4$ ;  $p=4$ ;  $q=4$ ;  $r=4$ ;  $u=4$ ;  $D=0.15$ ;  $K_1=2$ ;  $K_2=5$ ;  $K_3=2$ ;  $K_5=0.5$ ;  $K_6=0.5$ ;  $k_1=0.5$ ;  $k_2=0.6$ ;  $k_3=2$ ;  $k_4=2$ ;  $X_0=0$ ;  $S_0=45$ ;  $Y_{XS}=0.6$ ;  $Y_{PS1}=0.4$ ;  $Y_{PS2}=1.8$ ;  $\mu_{max}=2.2$ ;  $K_S=0.75$ ;  $K_m=0.5$ ;

*Parameters for Fig. 9:*  $\alpha_1=0.8$ ;  $\alpha_2=0.05$ ;  $\alpha_3=0.05$ ;  $\alpha_4=0.8$ ;  $\beta_1=0.5$ ;  $\beta_2=2.0$ ;  $m=4$ ;  $n=4$ ;  $p=4$ ;  $q=4$ ;  $r=4$ ;  $u=4$ ;  $D=0.15$ ;  $K_1=2$ ;  $K_2=5$ ;  $K_4=2$ ;  $K_5=0.5$ ;  $K_6=0.5$ ;  $k_1=0.5$ ;  $k_2=0.6$ ;  $k_3=2$ ;  $k_4=2$ ;  $X_0=0$ ;  $S_0=45$ ;  $Y_{XS}=0.6$ ;  $Y_{PS1}=0.4$ ;  $Y_{PS2}=1.8$ ;  $\mu_{max}=2.2$ ;  $K_S=0.75$ ;  $K_m=0.5$ ;

*Parameters for Fig. 10:*  $\alpha_1=0.8$ ;  $\alpha_2=0.05$ ;  $\alpha_3=0.05$ ;  $\alpha_4=0.8$ ;  $\beta_1=0.5$ ;  $\beta_2=2.0$ ;  $m=4$ ;  $p=4$ ;  $q=4$ ;  $r=4$ ;  $u=4$ ;  $D=0.15$ ;  $K_1=2$ ;  $K_2=5$ ;  $K_3=2$ ;  $K_4=2$ ;  $K_5=0.5$ ;  $K_6=0.5$ ;  $k_1=0.5$ ;  $k_2=0.6$ ;  $k_3=2$ ;  $k_4=2$ ;  $X_0=0$ ;  $S_0=45$ ;  $Y_{XS}=0.6$ ;  $Y_{PS1}=0.4$ ;  $Y_{PS2}=1.8$ ;  $\mu_{max}=2.2$ ;  $K_S=0.75$ ;  $K_m=0.5$ ;
